# Supplementary material for: Folic acid derived-P5779 mimetics regulate DAMP-mediated inflammation through disruption of HMGB1:TLR4:MD-2 axes
Source: PubMed Central journal article supplement (PMC5814057; doi:10.1371/journal.pone.0193028), 2018-02-15
Supplement: pone.0193028.s001.pdf [file pone.0193028.s001.pdf]

|                    | Title  | docking score | glide gscore | XP GScore | glide evdw | glide ecoul | glide energy | glide einternal | glide emodel |
|--------------------|--------|---------------|--------------|-----------|------------|-------------|--------------|-----------------|--------------|
| Active molecules   | P5779  | 0.612         | 0.065        | 0.065     | -38.514    | -15.571     | -54.085      | 6.787           | -71.249      |
|                    | P5779  | -3.566        | -3.866       | -3.866    | -34.05     | -16.236     | -50.286      | 10.601          | -62.563      |
|                    | P5779  | -7.779        | -8.326       | -8.326    | -37.412    | -13.737     | -51.149      | 10.323          | -74.622      |
|                    | P5779  | -7.936        | -8.483       | -8.483    | -42.095    | -14.274     | -56.369      | 15.234          | -76.413      |
|                    | P5779  | -8.389        | -8.936       | -8.936    | -35.151    | -17.356     | -52.507      | 12.246          | -68.883      |
|                    | P5779  | -9.231        | -9.779       | -9.779    | -35.365    | -17.567     | -52.932      | 16.506          | -70.235      |
|                    | FCSE   | -6.238        | -6.538       | -6.538    | -30.262    | -22.539     | -52.801      | 9.062           | -69.869      |
|                    | FCSE   | -6.526        | -6.826       | -6.826    | -28.918    | -20.608     | -49.525      | 10.123          | -67.614      |
|                    | FCSE   | -7.082        | -7.382       | -7.382    | -27.201    | -24.257     | -51.458      | 11.656          | -70.895      |
|                    | FCSE   | -7.925        | -8.473       | -8.473    | -37.173    | -17.578     | -54.75       | 12.352          | -70.119      |
|                    | FCSE   | -8.041        | -8.588       | -8.588    | -37.527    | -14.679     | -52.205      | 9.253           | -69.103      |
| Inactive molecules | FEED   | -4.954        | -5.213       | -5.213    | -38.453    | -13.92      | -52.373      | 17.095          | -64.494      |
|                    | FEED   | -9.749        | -10.364      | -10.364   | -36.276    | -15.333     | -51.61       | 17.955          | -61.436      |
|                    | FEEE   | -6.882        | -7.497       | -7.497    | -36.353    | -17.042     | -53.394      | 13.693          | -63.524      |
|                    | FEEE   | -9.124        | -9.383       | -9.383    | -32.829    | -12.901     | -45.73       | 15.174          | -59.258      |
|                    | FEEE   | -9.223        | -9.838       | -9.838    | -30.668    | -23.165     | -53.833      | 11.686          | -67.649      |
|                    | SFSE   | -0.677        | -1.262       | -1.262    | -27.94     | -20.249     | -48.189      | 7.876           | -62.965      |
|                    | SFSE   | -1.21         | -1.795       | -1.795    | -27.237    | -20.192     | -47.429      | 10.776          | -63.109      |
|                    | SFSE   | -3.907        | -4.492       | -4.492    | -33.772    | -19.585     | -53.356      | 11.851          | -68.403      |
|                    | SFSE   | -4.537        | -4.813       | -4.813    | -30.916    | -16.347     | -47.263      | 11.667          | -58.566      |
|                    | SFSE   | -4.976        | -5.562       | -5.562    | -32.094    | -19.152     | -51.246      | 14.935          | -63.236      |
|                    | SSE    | 2.273         | 1.981        | 1.981     | -26.253    | -9.724      | -35.977      | 5.844           | -45.833      |
|                    | SSE    | -1.308        | -1.6         | -1.6      | -22.188    | -17.727     | -39.914      | 12.417          | -45.073      |
|                    | SSE    | -3.474        | -3.767       | -3.767    | -16.694    | -21.817     | -38.511      | 8.073           | -50.753      |
|                    | SSE    | -4.228        | -4.787       | -4.787    | -17.777    | -17.666     | -35.442      | 4.143           | -44.915      |
| SSE                | -4.861 | -5.154        | -5.154       | -20.159   | -20.819    | -40.979     | 11.792       | -47.427         |              |

**Suppl. Table 1.** Docking statistics of active and inactive tetramers on TLR4/MD-2 complex.
